# Supplementary material
Source: PubMed Central journal article supplement (PMC2878078)

## SUPPLEMENTAL FIGURE LEGENDS

Supplemental Fig. 1 Characterization of an additional RPA1-like predicted protein in *T. thermophila*.

*A*, Comparison of *T. thermophila* Rpa1 and the RPA1-like protein Rlp1. Amino acid identity (ID) and additional similarity (SIM) determinations within the predicted OB-fold domains were performed using ClustalW. The GenBank accession number for the confirmed mRNA of *RLP1* is GU384877.

*B*, *RLP1* knockout (KO) strains. A Southern blot of digested genomic DNA from four clonally isolated cell lines disrupted for *RLP1* is shown. The wild-type gene restriction fragment (WT) is entirely replaced by the restriction fragment from gene disruption with the selectable marker cassette (*neo2*). The fragment labeled "bg" is from background non-specific hybridization.

Supplemental Fig. 2. Product dissociation profiles for  $\text{Teb1}^{\text{FL}}$  and  $\text{Teb1}^{\text{C}}$  holoenzymes.

The intensities of products ending in TT-3' or TTG-3' from each repeat synthesis were quantified separately, normalized for content of radiolabeled dGTP, and then summed to represent the total product. Relative molar amount of product is plotted on a log scale. Number of G-tracts includes primer sequence.

*A*, Quantification of product profiles for reactions from Fig. 5A, using the two 40 minute reaction time points. Reactions contained final concentrations of 0.3  $\mu\text{M}$  dGTP, 200 nM  $(\text{GT}_2\text{G}_3)_3$ , and 200 nM of the indicated form of  $\text{Teb1}$ .

*B*, Quantification of product profiles for reactions from Fig. 5B, comparing the  $(\text{GT}_2\text{G}_3)_3$  and  $\text{NT6}(\text{T}_2\text{G}_4)_3$  primers with sequences shown in Fig. 5C. Reactions contained final concentrations of 0.3  $\mu\text{M}$  dGTP, 200 nM primer, and 1  $\mu\text{M}$   $\text{Teb1}^{\text{C}}$ . The higher concentration of  $\text{Teb1}^{\text{C}}$  compared to assays in (*A*) reduced the amount of low-RAP enzyme. Note the minor peak of product dissociation after synthesis of nine repeats, likely resulting from folding of a second G-quadruplex involving repeats five through nine.

# Supplemental Figure 1

**A**

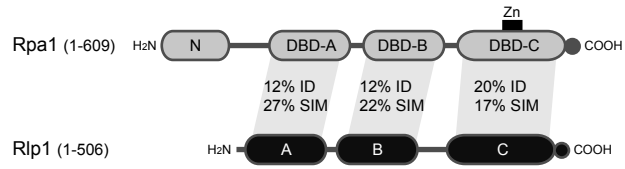

**B**

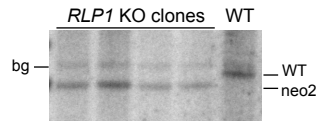

## Supplemental Figure 2

**A**

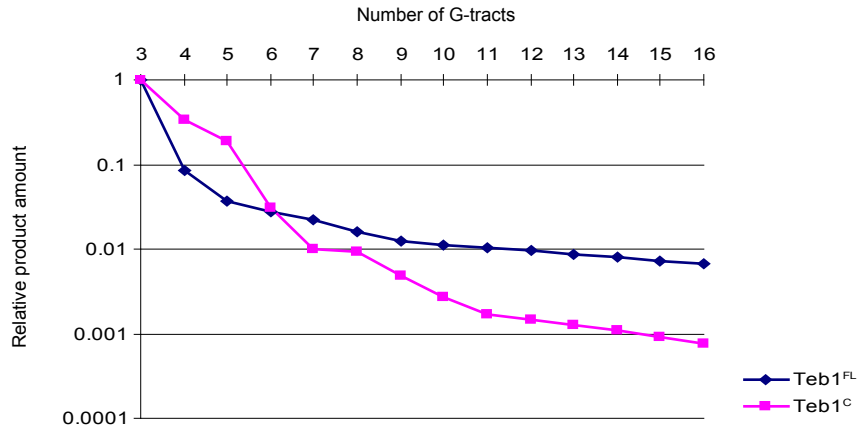

**B**

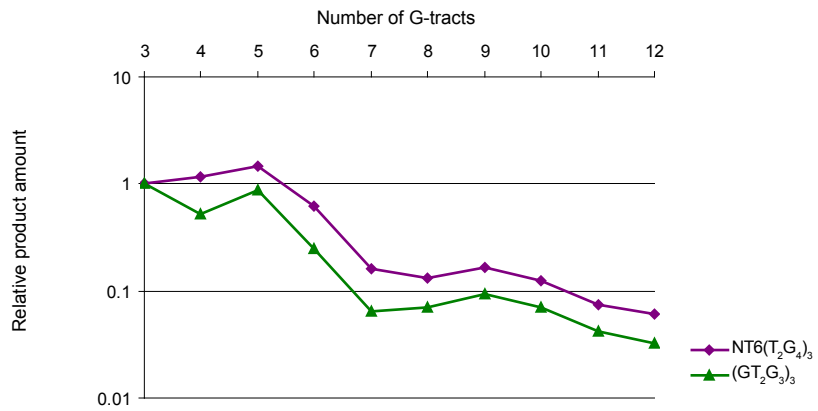

Supplement: supp_M110.119172_jbc.M110.119172-1.pdf [file supp_M110.119172_jbc.M110.119172-1.pdf]
